# Supplementary material for: Structure–function relationships of deep eutectic solvents for lignin extraction and chemical transformation
Source: Royal Society of Chemistry journal article supplement (doi:10.1039/d0gc02439b), 2020-01-01
Supplement: d0gc02439b1.pdf [file d0gc02439b1.pdf]

## **Structure-function relationships of deep eutectic solvents for lignin extraction and chemical transformation**

Si Hong,<sup>a,b,1</sup> Xiao-Jun Shen,<sup>c,1</sup> Zhimin Xue,<sup>b</sup> Zhuohua Sun,<sup>a,b</sup> and Tong-Qi Yuan<sup>a,b,\*</sup>

<sup>a</sup>Beijing Advanced Innovation Center for Tree Breeding by Molecular Design, Beijing Forestry University, No.35 Tsinghua East Road, Beijing, 100083, P. R. China.

<sup>b</sup>Beijing Key Laboratory of Lignocellulosic Chemistry, Beijing Forestry University, No.35 Tsinghua East Road, Beijing, 100083, P. R. China.

<sup>c</sup>Beijing National Laboratory for Molecular Sciences, CAS Key Laboratory of Colloid and Interface and Thermodynamics, CAS Research/Education Center for Excellence in Molecular Sciences, Institute of Chemistry, Chinese Academy of Sciences, Beijing 100190 (P. R. China).

†Corresponding author: Beijing Advanced Innovation Center for Tree Breeding by Molecular Design, Beijing Forestry University, Beijing, 100083, P. R. China. Tel./fax: +86-010-6233-6903; E-mail address: y tq581234@bjfu.edu.cn (T. Q. Yuan).

<sup>1</sup> These authors contributed equally.

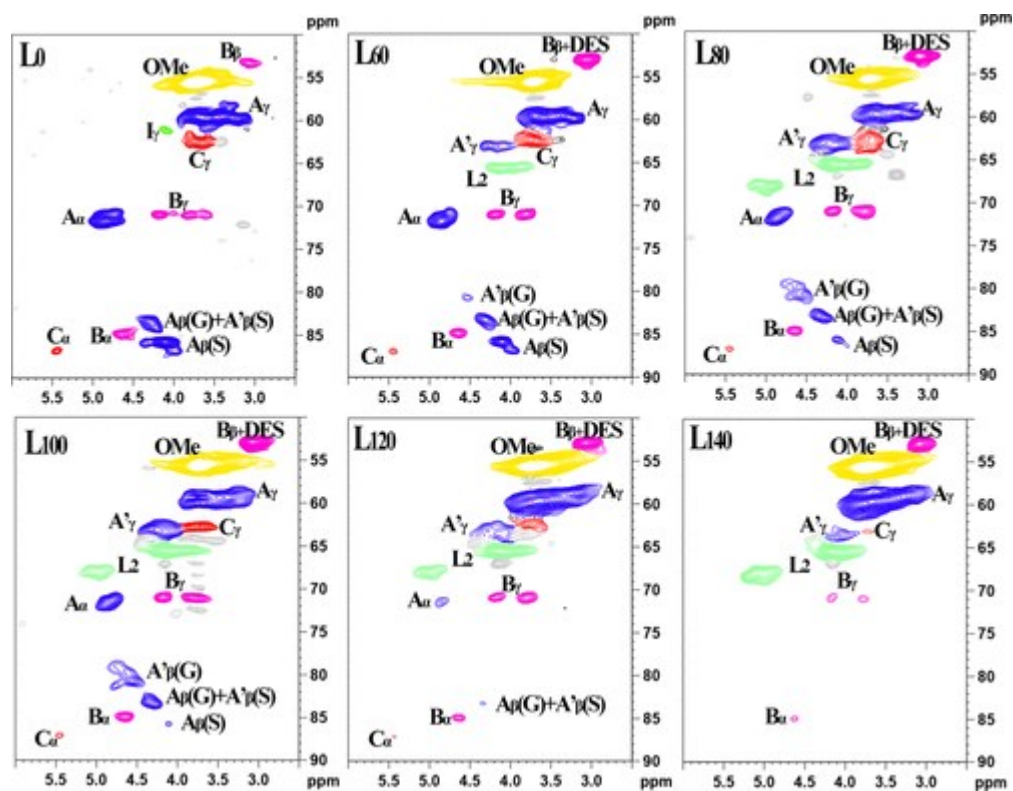

Fig. S1 Side-chain in the 2D HSQC NMR spectra of the lignins.<sup>1</sup> Lignin: (A)  $\beta$ -O-4' aryl ether linkages with a free-OH at the  $\gamma$ -carbon; (A')  $\beta$ -O-4' aryl ether linkages with acylated; (B) resinol substructures formed by  $\beta$ - $\beta$ ,  $\alpha$ -O- $\gamma$ , and  $\gamma$ -O- $\alpha$  linkages; (C) phenylcoumaran substructures formed by  $\beta$ -5 and  $\alpha$ -O-4' linkages; (L) lactic acid; (I) p-hydroxycinnamyl alcohol end groups; (G) guaiacyl units; (S) syringyl units; (S') oxidized syringyl units with a C $\alpha$  ketone.

### Reference:

1. X. J. Shen, J. L. Wen, T. Y. Chen, H. M. Wang, Q. Q. Mei, F. X. Yue and T. Q. Yuan, *ACS Sustain. Chem. Eng.*, 2019, 8, 2130-2137.
